# Supplementary material
Source: MDPI journal article supplement (https://www.mdpi.com/2673-8392/3/1/2)
Supplement: s1 [file s1]

Table S1. Summary of Literature

| Outcome Discussed                                                   | Citation (in order presented in text) | Data Collection Period                                                                                                  | Findings discussed                                                                                                                                                                                                                                                                 | Sample size                                                                                                                                   | Type of study                   | Region     | Summary of results                                                                                                                                                                                                 |
|---------------------------------------------------------------------|---------------------------------------|-------------------------------------------------------------------------------------------------------------------------|------------------------------------------------------------------------------------------------------------------------------------------------------------------------------------------------------------------------------------------------------------------------------------|-----------------------------------------------------------------------------------------------------------------------------------------------|---------------------------------|------------|--------------------------------------------------------------------------------------------------------------------------------------------------------------------------------------------------------------------|
| Vertical transmission of SARS-CoV-2 from infected mother to neonate | Jafari et al. [3]                     | January-October 2020                                                                                                    | <ul style="list-style-type: none"><li>5.3% rate of vertical transmission</li></ul>                                                                                                                                                                                                 | 10,000 SARS-CoV-2 infected mothers                                                                                                            | Systematic review/meta-analysis | N/A        | Vertical transmission of SARS-CoV-2 from infected mother to neonate occurs in 5% or less of cases, and this risk does not seem to be affected when breastfeeding, rooming-in, and skin-to-skin care are practiced. |
|                                                                     | Kotlyar et al. [2]                    | January - May 2020                                                                                                      | <ul style="list-style-type: none"><li>3.2% rate of vertical transmission</li></ul>                                                                                                                                                                                                 | 936 SARS-CoV-2 infected mothers                                                                                                               | Systematic review/meta-analysis | N/A        |                                                                                                                                                                                                                    |
|                                                                     | Mullins et al. [4]                    | January – July 2020                                                                                                     | <ul style="list-style-type: none"><li>1.8%-2.0% rate of vertical transmission</li></ul>                                                                                                                                                                                            | 4,005 SARS-CoV-2 infected mothers                                                                                                             | National registry               | USA and UK |                                                                                                                                                                                                                    |
|                                                                     | Walker et al. [7]                     | September 2019-June 2020                                                                                                | <ul style="list-style-type: none"><li>4.0% rate of vertical transmission overall</li><li>2.7% rate of vertical transmission in vaginal vs. 5.3% in cesarean deliveries</li><li>4.7% rate of vertical transmission in breastfed newborns vs. 5.3% in formula-fed newborns</li></ul> | 655 SARS-CoV-2 infected mothers (666 SARS-CoV-2 exposed infants)                                                                              | Systematic review/meta-analysis | N/A        |                                                                                                                                                                                                                    |
|                                                                     |                                       |                                                                                                                         |                                                                                                                                                                                                                                                                                    |                                                                                                                                               |                                 |            |                                                                                                                                                                                                                    |
|                                                                     |                                       |                                                                                                                         |                                                                                                                                                                                                                                                                                    |                                                                                                                                               |                                 |            |                                                                                                                                                                                                                    |
|                                                                     | Dumitriu et al. [5]                   | March-April 2020                                                                                                        | <ul style="list-style-type: none"><li>2.0% rate of vertical transmission with no clinical evidence of neonatal infection</li><li>Breastfeeding, rooming-in, and skin-to-skin care were encouraged</li></ul>                                                                        | 100 SARS-CoV-2 infected mothers (101 SARS-CoV-2 exposed infants)                                                                              | Retrospective cohort study      | USA        |                                                                                                                                                                                                                    |
| Norman et al. [6]                                                   | March 2020 – January 2021             | <ul style="list-style-type: none"><li>0.9% rate of vertical transmission</li></ul>                                      | 2,323 SARS-CoV-2 exposed infants                                                                                                                                                                                                                                                   | National registry                                                                                                                             | Sweden                          |            |                                                                                                                                                                                                                    |
| Vigil-Vázquez et al. [21]                                           | March-November 2020                   | <ul style="list-style-type: none"><li>5.1% rate of vertical transmission in exclusively breastfeeding infants</li></ul> | 177 SARS-CoV-2 exposed infants                                                                                                                                                                                                                                                     | Prospective cohort study                                                                                                                      | Spain                           |            |                                                                                                                                                                                                                    |
| Placental mechanisms involved in maternal SARS-CoV-2 infection      | Jafari et al. [3]                     | January-October 2020                                                                                                    | <ul style="list-style-type: none"><li>SARS-CoV-2 viral RNA detected in 12% of placental samples and 4-6% of amniotic fluid, cord blood, and vaginal secretions tested</li></ul>                                                                                                    | From SARS-CoV-2 infected mothers: 364 placenta samples, 968 amniotic fluid samples, 324 cord blood samples, and 253 vaginal secretion samples | Systematic review/meta-analysis | N/A        | Placental infection is rare in SARS-CoV-2 infected mothers, but does appear to occur more frequently than infection of                                                                                             |

|                           |                          |                                                                                                                                                                                                                                                                                                                                                                                                                                                                                                                                                                         |                                                                                                                                            |                                          |     |                                                                                                                                                                                                                     |
|---------------------------|--------------------------|-------------------------------------------------------------------------------------------------------------------------------------------------------------------------------------------------------------------------------------------------------------------------------------------------------------------------------------------------------------------------------------------------------------------------------------------------------------------------------------------------------------------------------------------------------------------------|--------------------------------------------------------------------------------------------------------------------------------------------|------------------------------------------|-----|---------------------------------------------------------------------------------------------------------------------------------------------------------------------------------------------------------------------|
| Kotlyar et al. [2]        | January-May 2020         | <ul style="list-style-type: none"> <li>SARS-CoV-2 viral RNA detected in 7.7% of placental samples, 0% of amniotic fluid samples, and 2.9% of cord blood samples tested</li> </ul>                                                                                                                                                                                                                                                                                                                                                                                       | From SARS-CoV-2 infected mothers: 26 placenta samples, 51 amniotic fluid samples, and 34 cord blood samples                                | Systematic review/meta-analysis          | N/A | <b>other biological samples. Irrespective of placental infection, maternal SARS-CoV-2 infection has been associated in some studies with placental alterations, including maternal vascular malperfusion (MVM).</b> |
| Beesley et al. [34]       | Pre-pandemic             | <ul style="list-style-type: none"> <li>Co-expression of ACE2 and TMPRSS2 only occurred in the fetal gastrointestinal tract, and did not occur in the placenta</li> </ul>                                                                                                                                                                                                                                                                                                                                                                                                | From uninfected mothers and fetuses: 6 fetal tissue samples, 6 placenta samples                                                            | Retrospective analysis of tissue samples | UK  |                                                                                                                                                                                                                     |
| Shanes, Mithal et al. [9] | March-May 2020           | <ul style="list-style-type: none"> <li>Maternal vascular malperfusion (MVM) was more common in placentas of women with SARS-CoV-2 infection during pregnancy than historical controls</li> </ul>                                                                                                                                                                                                                                                                                                                                                                        | 16 SARS-CoV-2 infected mothers; 17,479 historical controls                                                                                 | Retrospective cohort study               | USA |                                                                                                                                                                                                                     |
| Shanes, Miller et al. [8] | March 2020-February 2022 | <ul style="list-style-type: none"> <li>MVM occurred in 63% of women infected with SARS-CoV-2 during pregnancy, vs. 47% of controls</li> <li>MVM occurred in varying proportions of women infected with SARS-CoV-2 depending on which stage of the pandemic they were infected during, suggesting possible variant-specific effects of infection on placental histopathology: 82% of women infected with SARS-CoV-2 during the Delta era exhibited MVM, vs. 65% of those infected during the Alpha/Gamma era and 55% of those infected during the Omicron era</li> </ul> | 883 SARS-CoV-2 infected mothers (673 pre-variant of concern era, 90 Alpha/Gamma era, 60 Delta era, 56 Omicron era); 185 uninfected mothers | Prospective cohort study                 | USA |                                                                                                                                                                                                                     |
| Levitan et al. [36]       | March-May 2020           | <ul style="list-style-type: none"> <li>No differences in placental histopathological features were detected between women infected with SARS-CoV-2 during pregnancy and uninfected controls</li> </ul>                                                                                                                                                                                                                                                                                                                                                                  | 65 SARS-CoV-2 infected mothers; 85 uninfected mothers                                                                                      | Retrospective cohort study               | USA |                                                                                                                                                                                                                     |
| Zhang et al. [37]         | March-August 2020        | <ul style="list-style-type: none"> <li>No differences in placental histopathological features were detected between women infected with SARS-CoV-2 during pregnancy and uninfected controls</li> </ul>                                                                                                                                                                                                                                                                                                                                                                  | 101 SARS-CoV-2 infected mothers; 121 uninfected mothers                                                                                    | Retrospective cohort study               | USA |                                                                                                                                                                                                                     |

|                                                               |                       |                         |                                                                                                                                                                                                                                                                                                                                           |                                  |                            |        |                                                                                                                                                                                                  |
|---------------------------------------------------------------|-----------------------|-------------------------|-------------------------------------------------------------------------------------------------------------------------------------------------------------------------------------------------------------------------------------------------------------------------------------------------------------------------------------------|----------------------------------|----------------------------|--------|--------------------------------------------------------------------------------------------------------------------------------------------------------------------------------------------------|
|                                                               | Mourad et al. [10]    | March-October 2020      | <ul style="list-style-type: none"> <li>COVID-19 disease severity did not predict placental histopathological features in women infected with SARS-CoV-2 late in pregnancy</li> <li>Placental expression of ACE2 and interferon-induced transmembrane antiviral genes was higher in pregnant women with severe COVID-19 disease</li> </ul> | 66 SARS-CoV-2 infected mothers   | Prospective cohort study   | USA    |                                                                                                                                                                                                  |
| <b>Clinical outcomes in newborns infected with SARS-CoV-2</b> | Gale et al. [46]      | March-April 2020        | <ul style="list-style-type: none"> <li>0.05-0.06% of the national newborn population was infected with SARS-CoV-2</li> <li>36% of infected newborns required intensive care or respiratory support (but 24% of the infected newborns were born preterm)</li> </ul>                                                                        | 66 SARS-CoV-2 infected newborns  | National registry          | UK     | <b>Overall, newborns infected with SARS-CoV-2 show favorable outcomes and a mild disease course, and rarely require intensive care or respiratory support related to their COVID-19 disease.</b> |
|                                                               | Dong et al. [47]      | January-February 2020   | <ul style="list-style-type: none"> <li>10.7% of infants under one year old who were infected with SARS-CoV-2 had severe COVID-19 disease</li> </ul>                                                                                                                                                                                       | 376 SARS-CoV-2 infected newborns | National registry          | China  |                                                                                                                                                                                                  |
|                                                               | Norman et al. [6]     | March 2020-January 2021 | <ul style="list-style-type: none"> <li>0% of 21 infants infected with SARS-CoV-2 during the study period had any morbidity related to COVID-19 disease</li> </ul>                                                                                                                                                                         | 21 SARS-CoV-2 infected newborns  | National registry          | Sweden |                                                                                                                                                                                                  |
|                                                               | Mithal et al. [49]    | April-May 2020          | <ul style="list-style-type: none"> <li>0% of newborns with COVID-19 disease seen in the hospital system reported on required respiratory support</li> </ul>                                                                                                                                                                               | 18 SARS-CoV-2 infected newborns  | Retrospective cohort study | USA    |                                                                                                                                                                                                  |
|                                                               | Hassoun et al. [50]   | March-April 2020        | <ul style="list-style-type: none"> <li>0% of newborns with COVID-19 disease seen in the hospital system reported on required respiratory support</li> </ul>                                                                                                                                                                               | 8 SARS-CoV-2 infected newborns   | Case series                | USA    |                                                                                                                                                                                                  |
|                                                               | Leibowitz et al. [52] | March-April 2020        | <ul style="list-style-type: none"> <li>18 of 20 symptomatic newborns infected with SARS-CoV-2 and seen in the hospital system reported on had a mild disease course</li> </ul>                                                                                                                                                            | 20 SARS-CoV-2 infected newborns  | Retrospective cohort study | USA    |                                                                                                                                                                                                  |
|                                                               | Nanavati et al. [53]  | April-July 2020         | <ul style="list-style-type: none"> <li>7 of 21 newborns infected with SARS-CoV-2 were symptomatic, and no term infants required respiratory care</li> <li>20 of 21 infants were followed up two months after discharge and</li> </ul>                                                                                                     | 21 SARS-CoV-2 infected newborns  | Retrospective cohort study | India  |                                                                                                                                                                                                  |

|                                                                                                               |                          |                           |                                                                                                                                                                                                                                                                                                            |                                                                      |                                 |                                           |                                                                                                                                                                                                                                                                                                         |
|---------------------------------------------------------------------------------------------------------------|--------------------------|---------------------------|------------------------------------------------------------------------------------------------------------------------------------------------------------------------------------------------------------------------------------------------------------------------------------------------------------|----------------------------------------------------------------------|---------------------------------|-------------------------------------------|---------------------------------------------------------------------------------------------------------------------------------------------------------------------------------------------------------------------------------------------------------------------------------------------------------|
|                                                                                                               |                          |                           | showed no further symptoms or repeat hospitalizations                                                                                                                                                                                                                                                      |                                                                      |                                 |                                           |                                                                                                                                                                                                                                                                                                         |
|                                                                                                               | Bhuiyan et al. [54]      | January-June 2020         | <ul style="list-style-type: none"> <li>Over 90% of the children under five years old and infected with SARS-CoV-2 had asymptomatic, mild, or moderate COVID-19 disease</li> <li>43% had asymptomatic disease</li> <li>7% had severe disease</li> </ul>                                                     | 1,214 SARS-CoV-2 infected children under age 5                       | Systematic review/meta-analysis | N/A                                       |                                                                                                                                                                                                                                                                                                         |
|                                                                                                               | Brewster et al. [56]     | March 2020-January 2022   | <ul style="list-style-type: none"> <li>Infants and children infected with SARS-CoV-2 during the Omicron wave of the pandemic were more likely to be diagnosed with COVID-19 associated Croup</li> <li>0% of infants and children included in the study required invasive ventilation</li> </ul>            | 75 SARS-CoV-2 infected children (14 pre-Omicron era, 61 Omicron era) | Retrospective cohort study      | USA                                       |                                                                                                                                                                                                                                                                                                         |
| <b>Clinical outcomes in newborns exposed to SARS-CoV-2 in utero, irrespective of newborn infection status</b> | Sánchez-Luna et al. [11] | March-May 2020            | <ul style="list-style-type: none"> <li>The preterm birth rate of newborns exposed to SARS-CoV-2 in utero was 15.7%, more than double the national average in Spain of 7.5%</li> </ul>                                                                                                                      | 497 SARS-CoV-2 infected mothers (503 SARS-CoV-2 exposed infants)     | National registry               | Spain                                     | <b>Newborns exposed to maternal SARS-CoV-2 infection in utero appear to be at increased risk for preterm birth, which may be driven by increased disease severity in pregnant women. Trimester of SARS-CoV-2 infection may also play a role in driving preterm birth, but current data are unclear.</b> |
|                                                                                                               | Mullins et al. [4]       | January-August 2020       | <ul style="list-style-type: none"> <li>15.7% preterm birth rate in newborns exposed to SARS-Cov-2 in utero in the US registry, vs. a 10% national average (56)</li> <li>12.0% preterm birth rate in newborns exposed to SARS-Cov-2 in utero in the UK registry, vs. a 75% national average (57)</li> </ul> | 4,005 SARS-CoV-2 infected mothers                                    | National registry               | USA and UK                                |                                                                                                                                                                                                                                                                                                         |
|                                                                                                               | Norman et al. [6]        | March 2020 – January 2021 | <ul style="list-style-type: none"> <li>Increased rates of preterm birth mediated increased rates of neonatal respiratory disorders in newborns exposed to SARS-CoV-2 in utero</li> </ul>                                                                                                                   | 2,323 SARS-CoV-2 exposed infants                                     | National registry               | Sweden                                    |                                                                                                                                                                                                                                                                                                         |
|                                                                                                               | Gomez et al. [13]        | April 2020-February 2021  | <ul style="list-style-type: none"> <li>Women with moderate or severe COVID-19 disease were more likely to give birth preterm and have neonates admitted to intensive care</li> </ul>                                                                                                                       | 377 SARS-CoV-2 infected mothers; 357 uninfected mothers              | Prospective cohort study        | Brazil                                    |                                                                                                                                                                                                                                                                                                         |
|                                                                                                               | Villar et al. [14]       | March-October 2020        | <ul style="list-style-type: none"> <li>Women with symptomatic COVID-19 disease during pregnancy delivered 0.8 weeks earlier than uninfected women</li> </ul>                                                                                                                                               | 706 SARS-CoV-2 infected mothers; 1424 uninfected mothers             | Prospective cohort study        | 18 countries (representing South America, |                                                                                                                                                                                                                                                                                                         |

|                               |                             |                                                                                                                                                                                                                                                                                                                                                                                                            |                                                                                        |                                 |                                   |                                                          |
|-------------------------------|-----------------------------|------------------------------------------------------------------------------------------------------------------------------------------------------------------------------------------------------------------------------------------------------------------------------------------------------------------------------------------------------------------------------------------------------------|----------------------------------------------------------------------------------------|---------------------------------|-----------------------------------|----------------------------------------------------------|
|                               |                             |                                                                                                                                                                                                                                                                                                                                                                                                            |                                                                                        |                                 |                                   | North America, Asia, Africa, Eastern and Western Europe) |
| Gulersen et al. [12]          | December 2021-February 2022 | <ul style="list-style-type: none"> <li>Women infected with SARS-CoV-2 during the Omicron era of the pandemic were significantly more likely than uninfected women to deliver preterm</li> </ul>                                                                                                                                                                                                            | 631 SARS-CoV-2 infected mothers; 4107 uninfected mothers                               | Retrospective cohort study      | USA                               |                                                          |
| Molenaar et al. [62]          | April-September 2020        | <ul style="list-style-type: none"> <li>No difference in rates of preterm delivery was detected between SARS-CoV-2 infected and uninfected women</li> </ul>                                                                                                                                                                                                                                                 | 116 SARS-CoV-2 infected mothers; 591 uninfected mothers                                | Prospective cohort study        | USA                               |                                                          |
| Nachea et al. [63]            | March 2020-March 2021       | <ul style="list-style-type: none"> <li>No difference in rates of preterm delivery was detected between SARS-CoV-2 infected and uninfected women</li> </ul>                                                                                                                                                                                                                                                 | 510 SARS-CoV-2 infected mothers; 402 uninfected mothers                                | Retrospective cohort study      | 6 countries in Sub-Saharan Africa |                                                          |
| Martinez-Portilla et al. [64] | February-October 2020       | <ul style="list-style-type: none"> <li>Women infected with SARS-CoV-2 during pregnancy were at higher risk for death, pneumonia, and intensive care unit admission than uninfected women closely matched on demographic variables and risk factors</li> </ul>                                                                                                                                              | 5183 SARS-CoV-2 infected mothers; 5183 uninfected mothers                              | National registry               | Mexico                            |                                                          |
| Zambrano et al. [65]          | January-October 2020        | <ul style="list-style-type: none"> <li>Compared to non-pregnant women with symptomatic COVID-19 disease, pregnant women with symptomatic COVID-19 disease were at higher risk for receiving invasive ventilation, receiving extracorporeal membrane oxygenation, being admitted to an intensive care unit, and death</li> <li>Age, race, ethnicity, and underlying conditions were adjusted for</li> </ul> | 23,434 SARS-CoV-2 infected mothers; 386,028 SARS-CoV-2 infected nonpregnant women      | National registry               | USA                               |                                                          |
| Allotey et al. [66]           | December 2019-October 2020  | <ul style="list-style-type: none"> <li>Compared to nonpregnant women of reproductive age with COVID-19 disease, pregnant women with COVID-19 disease were more likely to need invasive ventilation and be admitted to an intensive</li> </ul>                                                                                                                                                              | >100,000 SARS-CoV-2 infected mothers; >2,000,000 SARS-CoV-2 infected nonpregnant women | Systematic review/meta-analysis | N/A                               |                                                          |

|                                                   |                      |                          |                                                             |                                                                                                                                                                                                                                                                                              |                                                                                                                               |                            |        |                                                          |
|---------------------------------------------------|----------------------|--------------------------|-------------------------------------------------------------|----------------------------------------------------------------------------------------------------------------------------------------------------------------------------------------------------------------------------------------------------------------------------------------------|-------------------------------------------------------------------------------------------------------------------------------|----------------------------|--------|----------------------------------------------------------|
|                                                   |                      |                          |                                                             | care unit, and less likely to exhibit mild to moderate symptoms                                                                                                                                                                                                                              |                                                                                                                               |                            |        |                                                          |
|                                                   | Metz et al. [67]     | March-July 2020          | <ul style="list-style-type: none"><li>•</li></ul>           | Women with severe or critical COVID-19 disease were at higher risk of preterm delivery than women with asymptomatic COVID-19 disease                                                                                                                                                         | 1,219 SARS-CoV-2 infected mothers                                                                                             | Retrospective cohort study | USA    |                                                          |
|                                                   | Newton et al. [68]   | January-December 2020    | <ul style="list-style-type: none"><li>•</li></ul>           | Women with critical COVID-19 disease were at higher risk of preterm delivery than women with mild COVID-19 disease                                                                                                                                                                           | 6,336 SARS-CoV-2 infected mothers                                                                                             | Retrospective cohort study | USA    |                                                          |
|                                                   | Piekos et al. [75]   | March 2020-July 2021     | <ul style="list-style-type: none"><li>•</li><li>•</li></ul> | Increased risk for preterm delivery and stillbirth in SARS-CoV-2 infected pregnant women were driven by those infected during the first and second trimester of pregnancy<br>Gestational age at delivery was predicted by gestational age at infection, but not by maternal disease severity | 882 SARS-CoV-2 infected mothers (85 first trimester, 226 second trimester, 571 third trimester); 19,769 uninfected mothers    | Retrospective cohort study | USA    |                                                          |
|                                                   | Hughes et al. [76]   | March 2020-December 2020 | <ul style="list-style-type: none"><li>•</li></ul>           | The 402 SARS-CoV-2 infected women, infected during the first or second trimester of pregnancy, had increased risk of preterm birth below 37 weeks gestation but not below 34 weeks gestation                                                                                                 | 402 SARS-CoV-2 infected mothers; 11,705 uninfected mothers                                                                    | Retrospective cohort study | USA    |                                                          |
|                                                   | Fallach et al. [77]  | February 2020-July 2021  | <ul style="list-style-type: none"><li>•</li></ul>           | Third trimester SARS-CoV-2 infection, but not first or second trimester infection, predicted increased risk of preterm delivery                                                                                                                                                              | 2,753 SARS-CoV-2 infected mothers (478 first trimester, 943 second trimester, 1332 third trimester); 2,753 uninfected mothers | Retrospective cohort study | Israel |                                                          |
|                                                   | Cosma et al. [78]    | April-June 2020          | <ul style="list-style-type: none"><li>•</li></ul>           | No differences in pregnancy outcomes were observed between women infected with SARS-CoV-2 during their first trimester of pregnancy and uninfected women                                                                                                                                     | 16 SARS-CoV-2 infected mothers; 105 uninfected mothers                                                                        | Prospective cohort study   | Italy  |                                                          |
| <b>Long-term outcomes in infants and children</b> | Shuffrey et al. [82] | March-December 2020      | <ul style="list-style-type: none"><li>•</li></ul>           | No differences were observed on the 6 month Ages and Stages Questionnaire, Third Edition (ASQ-3) between infants exposed                                                                                                                                                                     | 114 SARS-CoV-2 exposed infants; 141 unexposed infants                                                                         | Prospective cohort study   | USA    | <b>Current data using early developmental timepoints</b> |

| exposed to SARS-CoV-2 in utero | to SARS-CoV-2 in utero and unexposed infants |                       |                                                                                                                                                                                                                                                                                                                                                                                                                                                                           |                                                      |                            |        | suggest that infants exposed to maternal SARS-CoV-2 infection in utero do not appear to be at increased risk for long-term adverse developmental outcomes. Additional, longer-term follow-up is needed. |
|--------------------------------|----------------------------------------------|-----------------------|---------------------------------------------------------------------------------------------------------------------------------------------------------------------------------------------------------------------------------------------------------------------------------------------------------------------------------------------------------------------------------------------------------------------------------------------------------------------------|------------------------------------------------------|----------------------------|--------|---------------------------------------------------------------------------------------------------------------------------------------------------------------------------------------------------------|
|                                | Bianco et al. [83]                           | March-December 2020   | <ul style="list-style-type: none"> <li>Using the Infant Behavioral Questionnaire, no differences were observed in temperament at 6 months of age between infants exposed to SARS-CoV-2 in utero and unexposed infants</li> </ul>                                                                                                                                                                                                                                          | 63 SARS-CoV-2 exposed infants; 110 unexposed infants | Prospective cohort study   | USA    |                                                                                                                                                                                                         |
|                                | Ayed et al. [84]                             | April-December 2020   | <ul style="list-style-type: none"> <li>10% of infants exposed to maternal SARS-CoV-2 infection in utero showed signs of developmental delay (subdomain scores at least two standard deviations below population mean) on the ASQ-3 at 10-12 months of age, which is lower than the 15% pre-pandemic national average rate of developmental delay on the ASQ-3 in Lebanon, a country with similar geographical and cultural setting as Kuwait (81)</li> </ul>              | 298 SARS-CoV-2 exposed infants                       | Prospective cohort study   | Kuwait |                                                                                                                                                                                                         |
|                                | Buonsenso, Costa, Giordano et al. [86]       | March 2020-April 2021 | <ul style="list-style-type: none"> <li>No abnormal auxologic or neurologic outcomes have been detected in infants exposed to SARS-CoV-2 in utero at 3, 6, or 9 months of age</li> </ul>                                                                                                                                                                                                                                                                                   | 199 SARS-CoV-2 exposed infants                       | Prospective cohort study   | Italy  |                                                                                                                                                                                                         |
|                                | Edlow et al. [87]                            | March-September 2020  | <ul style="list-style-type: none"> <li>14 of 222 (6.3%) SARS-CoV-2 exposed infants had received a neurodevelopmental diagnosis on the International Classification of Diseases, 10<sup>th</sup> Edition (ICD-10) in the first year of life, vs. 227 of 7550 (3.0%) unexposed infants</li> <li>This difference was not statistically significant when full-term infants were evaluated separately, suggesting that prematurity mediates the observed difference</li> </ul> | 222 SARS-CoV-2 exposed infants, 7550 unexposed       | Retrospective cohort study | USA    |                                                                                                                                                                                                         |
